# Supplementary material for: Photochromism-induced multi-mode optical modulations and fluorescent temperature sensing in Sr/Er-codoped (K 0.5 Na 0.5 )NbO 3 ceramics
Source: Royal Society of Chemistry journal article supplement (doi:10.1039/d4qi01804d), 2024-01-01
Supplement: d4qi01804d1.pdf [file d4qi01804d1.pdf]

## Supporting Information

### Photochromism-induced multi-mode optical modulations and fluorescent temperature sensing in Sr/Er-codoped (K<sub>0.5</sub>Na<sub>0.5</sub>)NbO<sub>3</sub> ceramics

Fangyuan Yu,<sup>a,1</sup> Qifa Lin,<sup>a,1</sup> Xiangfu Zeng,<sup>a</sup> Ping Zhou,<sup>a</sup> Xiao Wu,<sup>\*a</sup> Cong Lin,<sup>a</sup>  
Chunlin Zhao,<sup>a</sup> Min Gao,<sup>a</sup> Tengfei Lin,<sup>a</sup> Xingan Jiang,<sup>b</sup> Laihui Luo<sup>c</sup> and Qiwei Zhang<sup>d</sup>

<sup>a</sup> Department of Material Science and Engineering, Fuzhou University, Fuzhou,  
350108, China.

<sup>b</sup> Institute of Micro/Nano Materials and Devices, Ningbo University of Technology,  
Ningbo 315211, China.

<sup>c</sup> Department of Microelectronic Science and Engineering, Ningbo University, Ningbo,  
315211, China

<sup>d</sup> College of Physics and Technology, Guangxi Normal University, Guilin, 541004,  
China.

<sup>1</sup> F. Yu and Q. Lin contributed equally to this work.

E-mail: wuxiao@fzu.edu.cn (Xiao Wu).

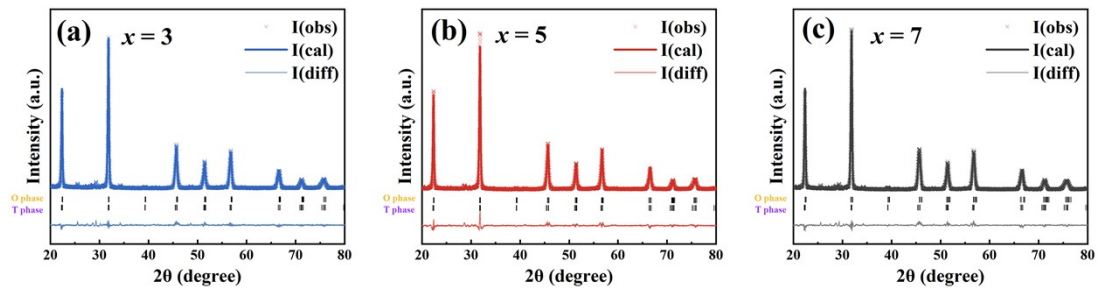

**Figure S1** Rietveld refinement XRD patterns of the  $x$ Sr-1Er-KNN ceramics, (a)  $x = 3$ , (b)  $x = 5$ , and (c)  $x = 7$ .

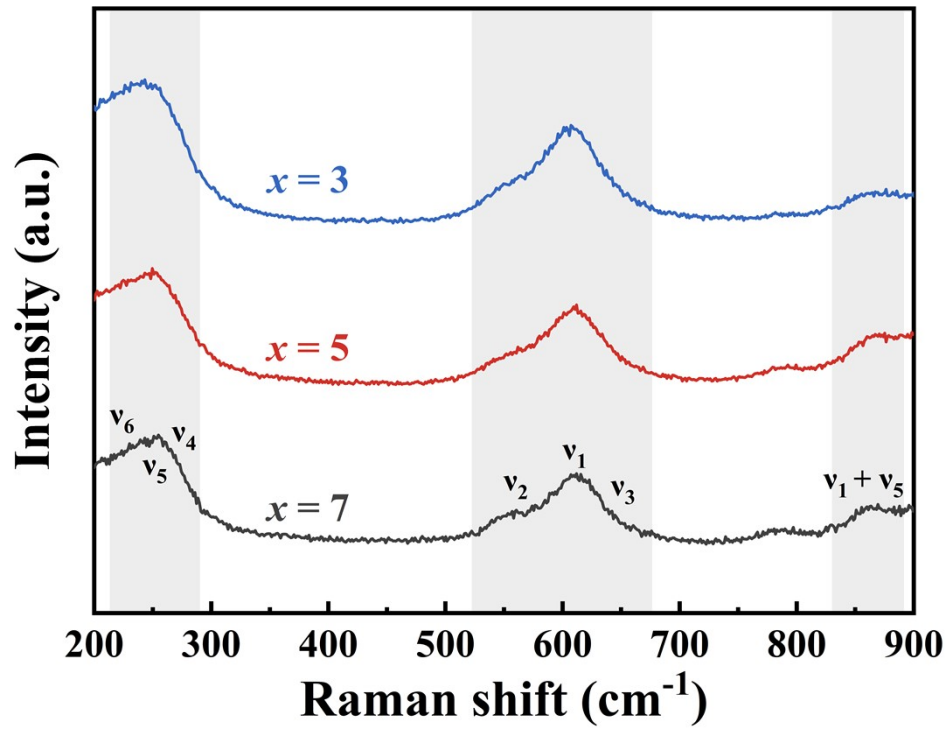

Figure S2 Raman spectra of the  $x$ Sr-1Er-KNN ceramics.

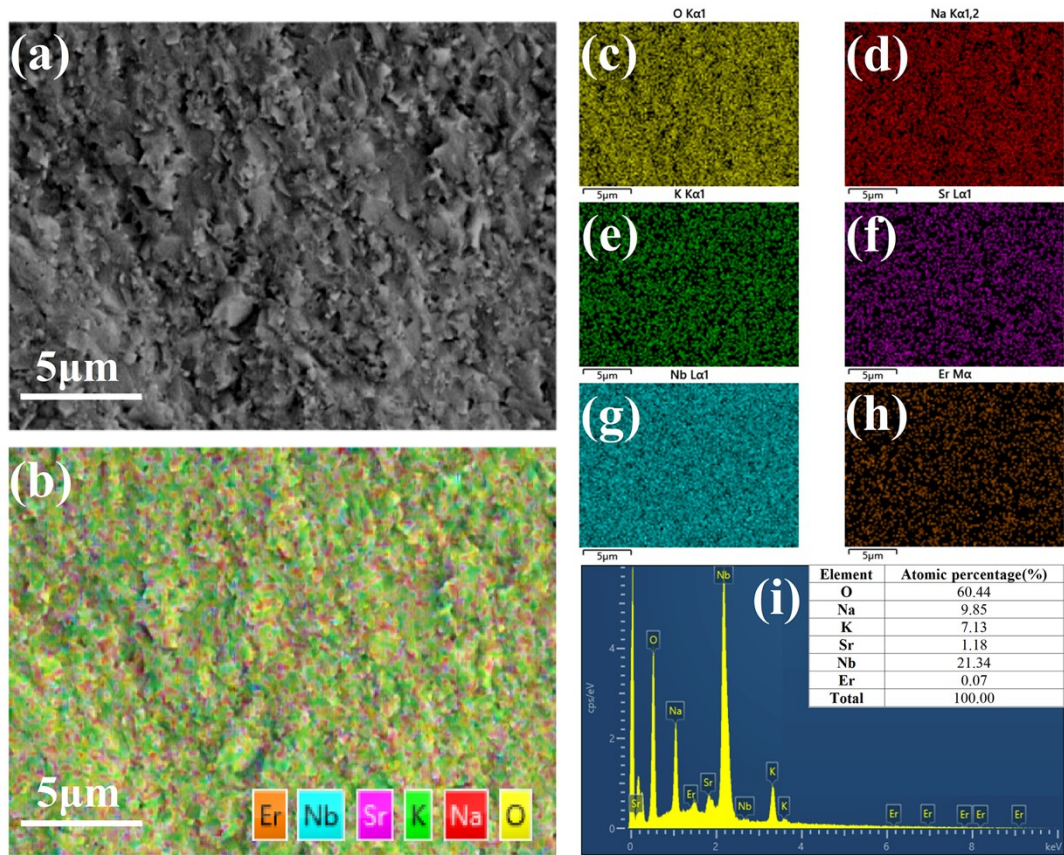

**Figure S3** (a)-(h) EDS elemental mapping images of the representative 5Sr-1Er-KNN ceramic. (i) EDS spectrum of the ceramic, and inset shows the corresponding atomic percentage.

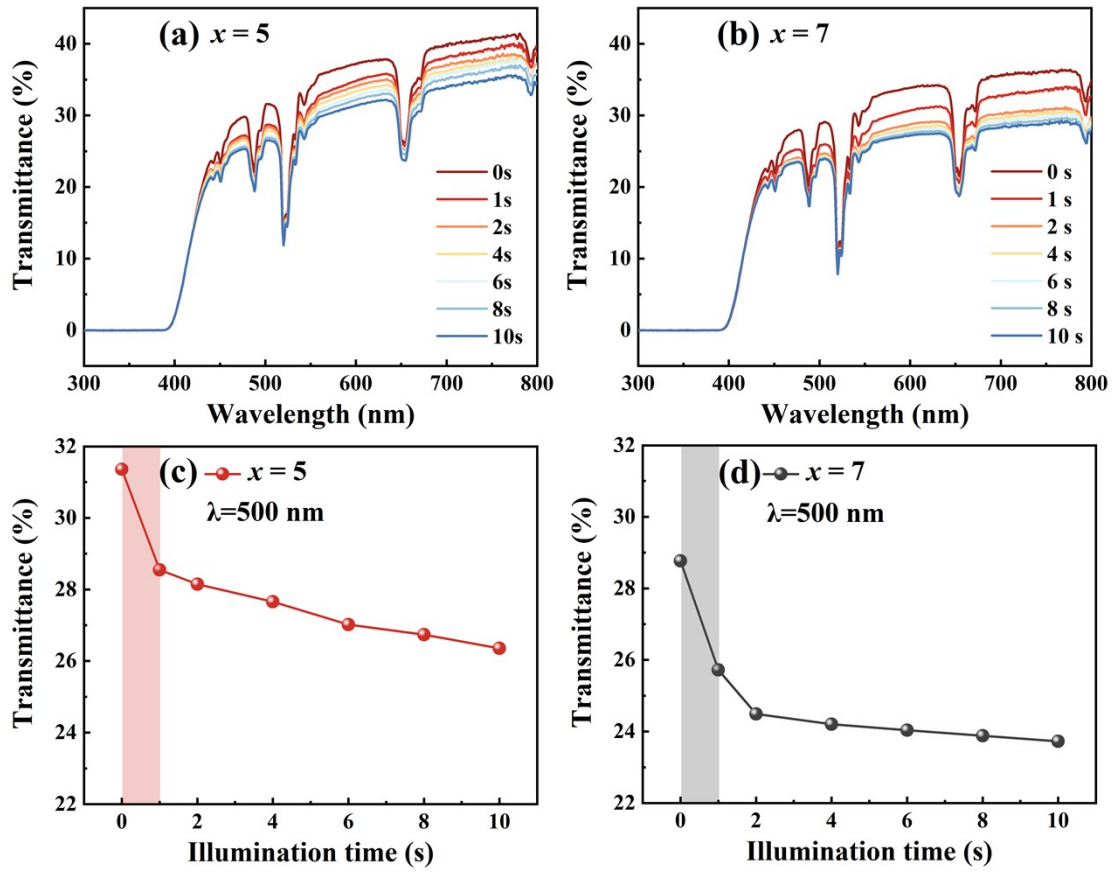

**Figure S4** Optical transmittance spectra of the  $x$ Sr-1Er-KNN ceramics with (a)  $x = 5$  and (b)  $x = 7$  with different illumination times. Transmittance ( $T$ ) values at 500 nm of the ceramics with (c)  $x = 5$  and (d)  $x = 7$  at different illumination times.

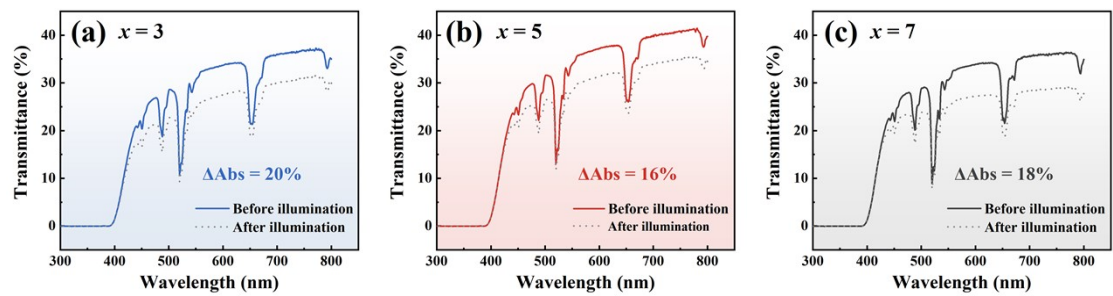

**Figure S5** Optical transmittances of the  $x$ Sr-1Er-KNN ceramics with (a)  $x = 3$ , (b)  $x = 5$  and (c)  $x = 7$  before and after illumination (for 10 s).

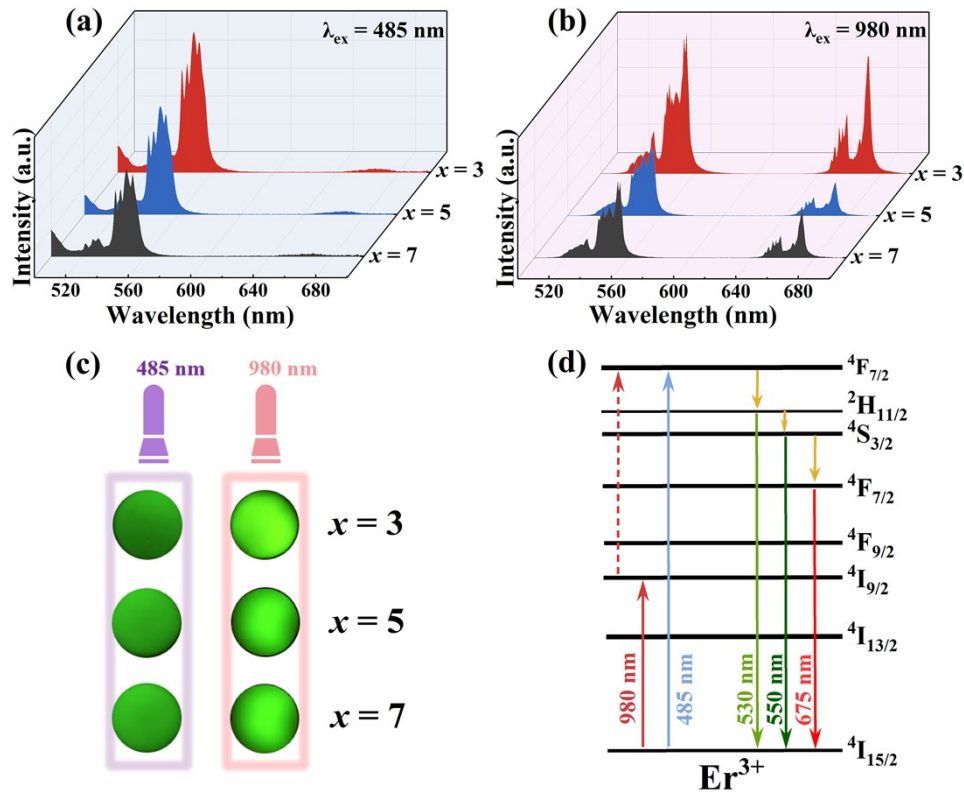

**Figure S6** (a) DSPL and (b) UCPL spectra of the  $x\text{Sr-1Er-KNN}$  ceramics. (c) Corresponding emission photos of the ceramics under the excitation of 485 nm or 980 nm. (d) Energy level diagram of  $\text{Er}^{3+}$  in the ceramics and possible electronic transition mechanism.

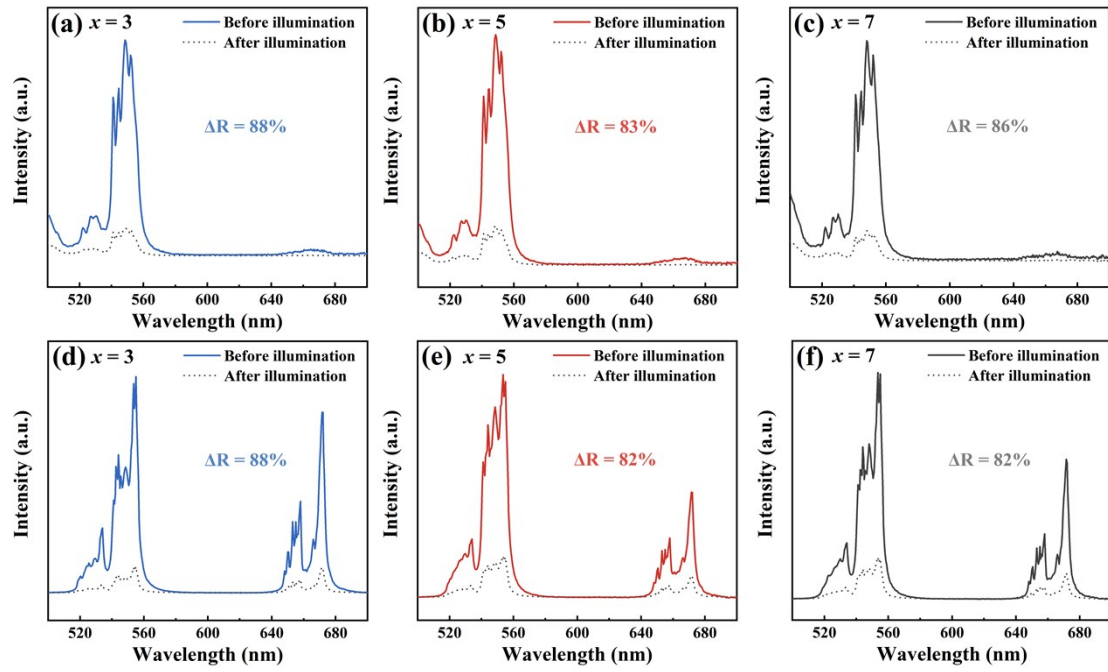

**Figure S7** DSPL spectra ( $\lambda_{\text{ex}} = 485 \text{ nm}$ ) of the  $x\text{Sr-1Er-KNN}$  ceramics with (a)  $x = 3$ , (b)  $x = 5$  and (c)  $x = 7$  before and after illumination with 405 nm laser for 10 s. UCPL spectra ( $\lambda_{\text{ex}} = 980 \text{ nm}$ ) of the ceramics with (d)  $x = 3$ , (e)  $x = 5$  and (f)  $x = 7$  before and after illumination with 405 nm laser for 10 s.



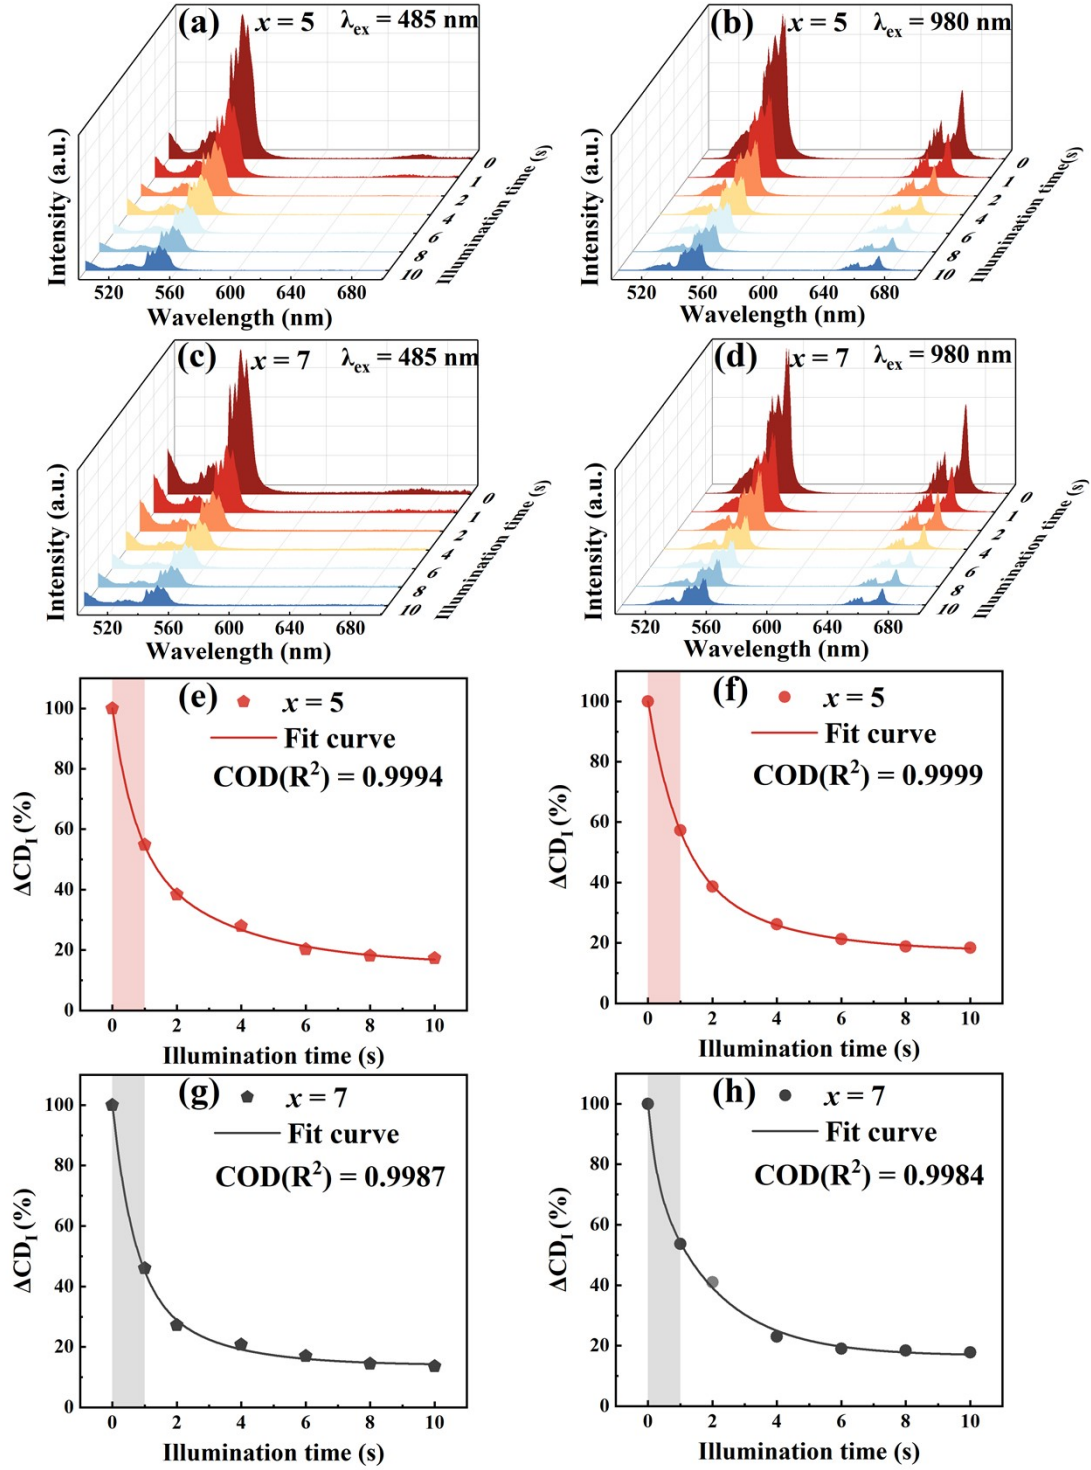

**Figure S8** Effect of illumination time on DSPL and UCPL spectra of the  $x$ Sr-1Er-KNN ceramics with (a-b)  $x = 5$  and (c-d)  $x = 7$ . Double exponential function fitting curves of  $\Delta CD_1$  for (e-f)  $x = 5$  based on DSPL spectra and (g-h)  $x = 7$  based on UCPL spectra.

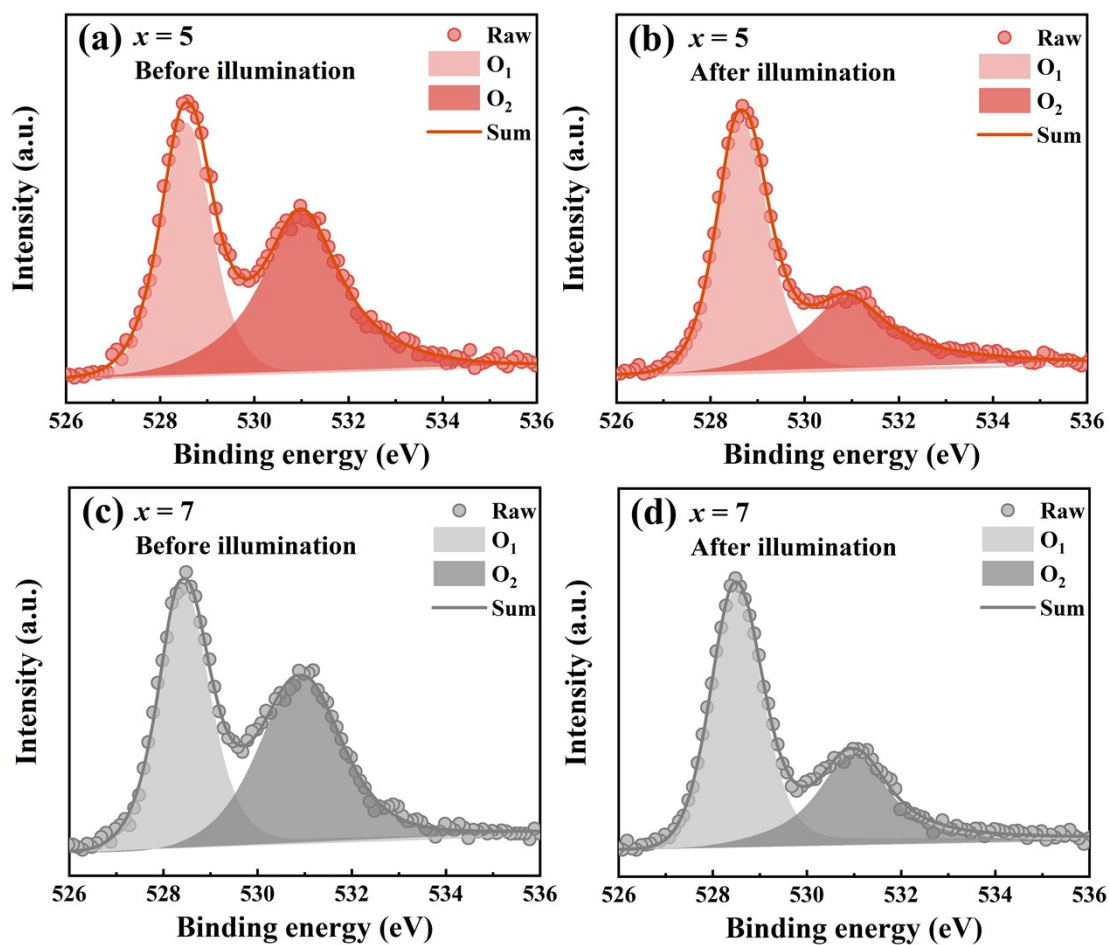

**Figure S9** O 1s XPS spectra of the  $x$ Sr-1Er-KNN ceramics with (a)  $x = 5$  and (c)  $x = 7$  before illumination and (b)  $x = 5$  and (d)  $x = 7$  after illumination.

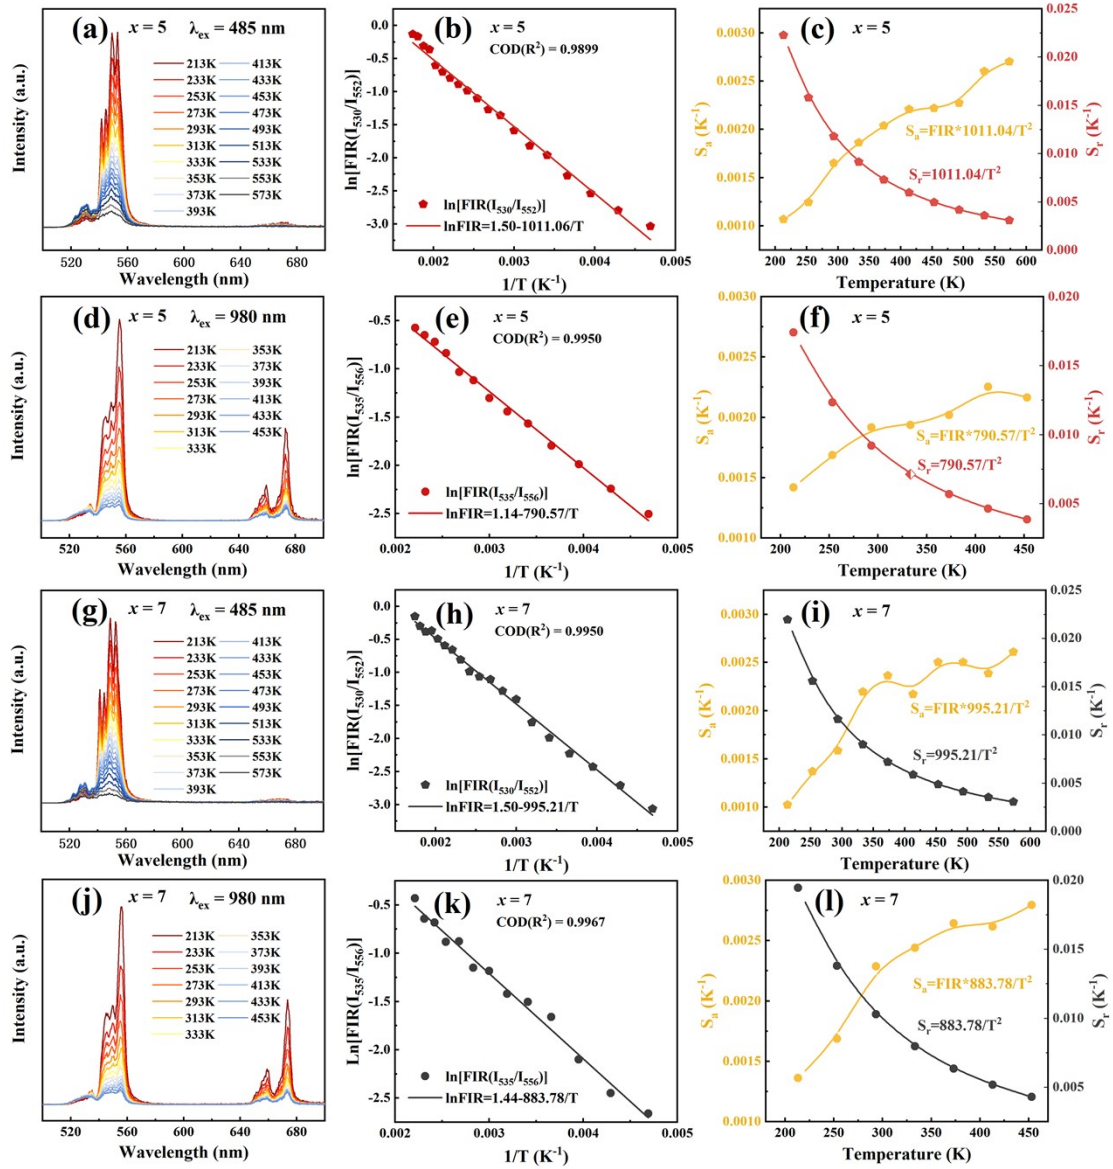

**Figure S10** Temperature-dependent emission spectra of the 5Sr-1Er-KNN ceramics, (a) DSPL and (d) UCPL. Temperature-dependent emission spectra of the 7Sr-1Er-KNN ceramics, (g) DSPL and (j) UCPL. Arrhenius plots of ln FIR versus inverse temperature of 5Sr-1Er-KNN, (b)  $\lambda_{\text{ex}} = 485$  nm and (e)  $\lambda_{\text{ex}} = 980$  nm; and of 7Sr-1Er-KNN, (h)  $\lambda_{\text{ex}} = 485$  nm and (k)  $\lambda_{\text{ex}} = 980$  nm.  $S_a$  and  $S_r$  values of 5Sr-1Er-KNN, (c)  $\lambda_{\text{ex}} = 485$  nm and (f)  $\lambda_{\text{ex}} = 980$  nm; and of 7Sr-1Er-KNN, (i)  $\lambda_{\text{ex}} = 485$  nm and (l)  $\lambda_{\text{ex}} = 980$  nm.

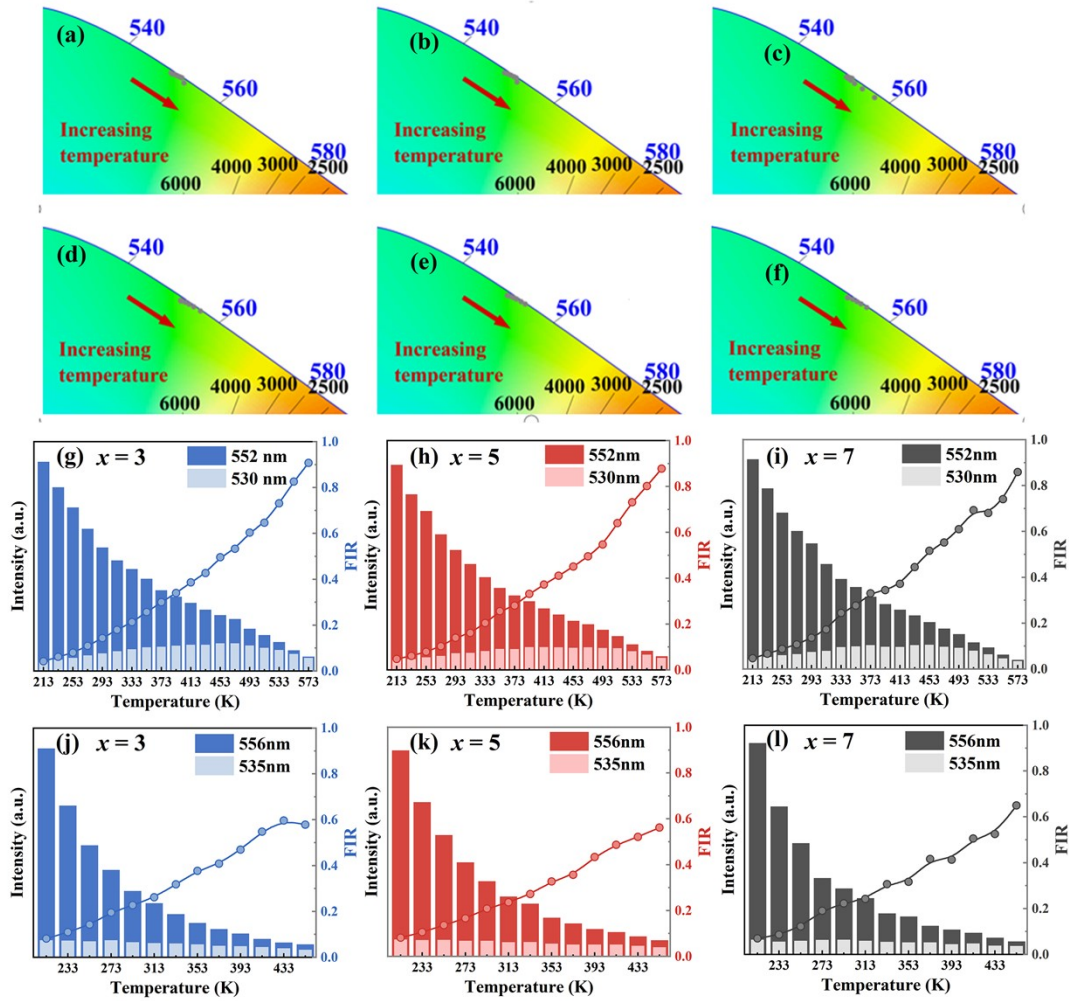

**Figure S11** CIE diagrams of the  $x$ Sr-1Er-KNN ceramics with (a)  $x = 3$ , (b)  $x = 5$  and (c)  $x = 7$  ( $\lambda_{ex} = 485$  nm); (d)  $x = 3$ , (e)  $x = 5$  and (f)  $x = 7$  ( $\lambda_{ex} = 980$  nm). FIR ratio and logarithmic fitting results, (g)  $x = 3$ , (h)  $x = 5$  and (i)  $x = 7$  ( $\lambda_{ex} = 485$  nm); (j)  $x = 3$ , (k)  $x = 5$  and (l)  $x = 7$  ( $\lambda_{ex} = 980$  nm).

**Table S1** Lattice parameters and error factor ( $R_w$ ) of the  $x$ Sr-1Er-KNN ceramics.

| Sample      | Phase | Lattice parameters |        |        |           | c/a    | $R_w$ (%) |
|-------------|-------|--------------------|--------|--------|-----------|--------|-----------|
|             |       | a (Å)              | b (Å)  | c (Å)  | ratio (%) |        |           |
| 3Sr-1Er-KNN | O     | 3.9334             | 5.5841 | 5.6355 | 34.89     | 1.4327 | 8.99      |
|             | T     | 3.9660             | 3.9660 | 3.9959 | 65.11     | 1.0075 |           |
| 5Sr-1Er-KNN | O     | 3.9547             | 5.6083 | 5.6074 | 23.55     | 1.4179 | 8.82      |
|             | T     | 3.9622             | 3.9622 | 3.9872 | 76.45     | 1.0063 |           |
| 7Sr-1Er-KNN | O     | 3.9606             | 5.6108 | 5.6338 | 49.24     | 1.4225 | 8.55      |
|             | T     | 3.9661             | 3.9661 | 3.9961 | 50.76     | 1.0076 |           |

**Table S2** Lorentzian fitting results of the  $x$ Sr-1Er-KNN ceramics based on the Raman spectra in the range of 500-700  $\text{cm}^{-1}$ .

| Sample      | Vibrational modes | Parameters                       |           |
|-------------|-------------------|----------------------------------|-----------|
|             |                   | Raman shift ( $\text{cm}^{-1}$ ) | Ratio (%) |
| 3Sr-1Er-KNN | $A_{1g}(v_1)$     | 611.29                           | 81.34     |
|             | $E_g(v_2)$        | 553.63                           | 18.66     |
| 5Sr-1Er-KNN | $A_{1g}(v_1)$     | 606.98                           | 87.52     |
|             | $E_g(v_2)$        | 548.44                           | 12.48     |
| 7Sr-1Er-KNN | $A_{1g}(v_1)$     | 609.47                           | 85.83     |
|             | $E_g(v_2)$        | 550.93                           | 14.17     |

**Table S3** The  $\tau_1$  and  $\tau_2$  values of double exponential function fitting curve of PL spectra for the  $x$ Sr-1Er-KNN ceramics under excitation of 485 nm or 980 nm.

| Sample      | Excitation wavelength | $\tau_1$ | $\tau_2$ |
|-------------|-----------------------|----------|----------|
| 3Sr-1Er-KNN | 485 nm                | 0.27     | 1.4      |
|             | 980 nm                | 0.23     | 1.37     |
| 5Sr-1Er-KNN | 485 nm                | 0.65     | 3.16     |
|             | 980 nm                | 0.95     | 3.14     |
| 7Sr-1Er-KNN | 485 nm                | 0.62     | 2.06     |
|             | 980 nm                | 0.62     | 2.06     |

**Table S4** O<sub>1</sub> area, O<sub>2</sub> area and area ratios of O<sub>2</sub>/O<sub>1</sub> of the *x*Sr-1Er-KNN ceramics based on the O 1s XPS spectra.

| Sample                            | O <sub>1</sub> area | O <sub>2</sub> area | O <sub>2</sub> /O <sub>1</sub> area ratio |
|-----------------------------------|---------------------|---------------------|-------------------------------------------|
| 3Sr-1Er-KNN (Before illumination) | 31323               | 65304               | 2.08                                      |
| 3Sr-1Er-KNN (After illumination)  | 67583               | 54552               | 0.81                                      |
| 5Sr-1Er-KNN (Before illumination) | 41172               | 24335               | 0.59                                      |
| 5Sr-1Er-KNN (After illumination)  | 72352               | 16498               | 0.23                                      |
| 7Sr-1Er-KNN (Before illumination) | 43132               | 26952               | 0.62                                      |
| 7Sr-1Er-KNN (After illumination)  | 65854               | 22820               | 0.35                                      |



**Table S5** The  $S_r$  values of  $x$ Sr-1Er-KNN under excitation of 485 nm or 980 nm.

| <b>Excitation</b> | <b>Sample</b> | <b><math>S_r</math> (<math>K^{-1}</math>)</b> | <b>Temperature (K)</b> |
|-------------------|---------------|-----------------------------------------------|------------------------|
| 485 nm            | 3Sr-1Er-KNN   | 0.023                                         | 213                    |
|                   | 5Sr-1Er-KNN   | 0.022                                         | 213                    |
|                   | 7Sr-1Er-KNN   | 0.022                                         | 213                    |
| 980 nm            | 3Sr-1Er-KNN   | 0.018                                         | 213                    |
|                   | 5Sr-1Er-KNN   | 0.017                                         | 213                    |
|                   | 7Sr-1Er-KNN   | 0.019                                         | 213                    |
